# Supplementary material for: Modelling enhanced phagocytosis of activated macrophage by outer membrane vesicles from Neisseria gonorrhoeae
Source: Research Square preprint supplement (doi:10.21203/rs.3.rs-7577586/v1), 2025-10-14
Supplement: Supplementary file 1 [file 54ad5e6a81b0576e457b0a53.docx]

Title: Modelling enhanced phagocytosis of activated macrophage by outer membrane vesicles from Neisseria gonorrhoeae

Author: Jiaru Yang1,#, Shilian Xu2,3,*,#, Thomas Naderer1,*

1 Department of Biochemistry and Molecular Biology, Biomedicine Discovery Institute, Monash University, Clayton, VIC 3800, Australia

2The Taub Faculty of Computer Science, Technion—Israel Institute of Technology, Haifa 3200003, Israel

3Faculty of Biology, Technion—Israel Institute of Technology, Haifa 3200003, Israel

*Corresponding author: [Thomas.Naderer@monash.edu](mailto:Thomas.Naderer@monash.edu), [shlomo.bergger@gmail.com](mailto:shlomo.bergger@gmail.com),

#Authors contributed equally to this work

This pdf file includes:

**Supplementary text**

**Figures S1 to S7**

**Tables S1 to S14**

**Table of Contents**

1. Model Selection and Parameter Estimation
   1. N. gonorrhoeae and E. coli Kinetics in Absence of Macrophages
   2. Live Cell Imaging Data of Naive and NOMV-Activated Macrophages in Absence of Bacteria
   3. Live Cell Imaging Data of NOMV-Activated Macrophages in Presence of E. coli
   4. Live Cell Imaging Data of Naive Macrophages in Presence of E. coli
   5. Live Cell Imaging Data of NOMV-Activated Macrophages in Presence of N. gonorrhoeae
   6. Live Cell Imaging Data of Naive Macrophages in Presence of N. gonorrhoeae
2. E. coli Kinetics in Presence of Macrophages Modelled by Semi-Saturated Systems (Systems 4 and 5)
3. Activated and Naive Macrophage Kinetics Tested Against E. coli
4. N. gonorrhoeae Kinetics in Presence of Naive/Activated Macrophages
5. **Model Selection and Parameter Estimation**

In this section, we detail the process of selecting the most appropriate mathematical model and estimating parameters by delineating the live cell imaging (LCI) assay data. We specifically compare the performance of the saturated phagocytosis model (System 3, Methods, main text), the semi-saturated phagocytosis model with increasing bacterial concentration (System 4, Methods, main text), and the semi-saturated phagocytosis model with increasing macrophage concentration (System 5, Methods, main text).

- 1. N. gonorrhoeae and E. coli Kinetics in Absence of Macrophages

To characterize bacterial growth in isolation, we fitted the logistic growth model (System 1, Methods, main text) to previously published bacterial growth assay data.

For N. gonorrhoeae, data were obtained from Reference [1]. The estimated parameters for the logistic growth model were: per capita growth rate , maximum carrying capacity , and sum of squared error. The fitted growth curve for N. gonorrhoeae is presented in Figure S1A.

For E. coli, data were obtained from Reference [2]. The estimated parameters for the logistic growth model were: per capita growth rate , maximum carrying capacity , sum of squared error (SSE) , and the fitted growth curve for E. coli is presented in Figure S1B.


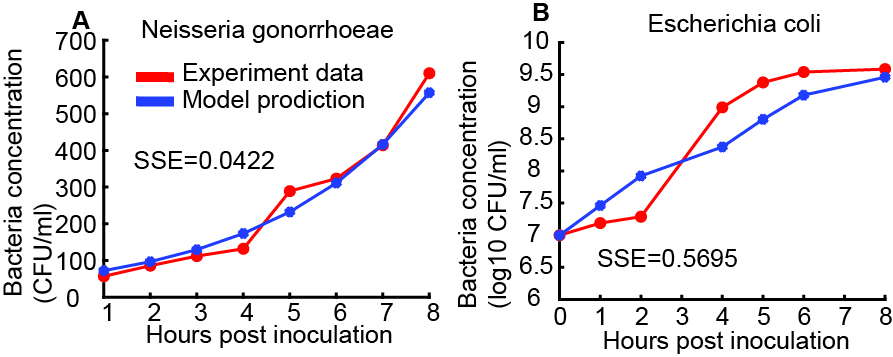


**Figure S1: Fitted Logistic Growth Curves for Bacteria in the Absence of Macrophages.** This figure displays the kinetics of bacterial growth without macrophage interaction, fitted to a logistic growth model (System 1). **(A)** N. gonorrhoeae Kinetics: Growth curve of N. gonorrhoeae. **(B)** E. coli Kinetics: Growth curve of E. coli.

- 1. Live Cell Imaging Data of Naive and NOMV-Activated Macrophages in Absence of Bacteria

To assess whether NOMV-induced activation impacts the natural death rate of macrophages, we fitted System 2 (Methods, main text) to live cell imaging data obtained from both naive macrophages and macrophages activated with N. gonorrhoeae Outer Membrane Vesicles (NOMVs), cultured in the absence of bacteria. The estimated natural death rates for naive and NOMV-activated macrophages are presented in Table S1 and Table S2, respectively.

**Table S1:** Natural Death Rate of Naive Macrophage

| Biological  replicates | 1 | 2 | 3 | 4 | 5 | 6 | 7 | 8 |
| --- | --- | --- | --- | --- | --- | --- | --- | --- |
| Natural death rate | 0.0046 | 0.0031 | 0.0032 | 0.0016 | 0.0031 | 0.006 | 0.0043 | 0.0064 |
| Biological  replicates | 9 | 10 | 11 | 12 | 13 | 14 | 15 |  |
| Natural death rate | 0.004 | 0.0046 | 0.0018 | 0.0024 | 0.0051 | 0.0058 | 0.0056 |  |

**Table S2:** Natural Death Rate of Activated Macrophage by *N. Gonorrhoeae* OMV

| Biological  replicates | 1 | 2 | 3 | 4 | 5 | 6 | 7 | 8 |
| --- | --- | --- | --- | --- | --- | --- | --- | --- |
| Natural death rate | 0.0038 | 0.0043 | 0.0026 | 0.0018 | 0.0024 | 0.0051 | 0.0058 | 0.0056 |

- 1. Live Cell Imaging Data of NOMV-Activated Macrophages in Presence of *E. coli*

To investigate the phagocytosis kinetics of macrophages activated by N. gonorrhoeae Outer Membrane Vesicles (NOMVs) against E. coli, we fitted three distinct models (System 3, System 4, and System 5; Methods, main text) to the corresponding live cell imaging (LCI) assay data. The fitted parameters, Sum of Squared Error (SSE), Akaike Information Criterion (AIC), and modified AIC for small sample sizes (AICc) for System 3, System 4, and System 5 are provided in Table S3, Table S4, and Table S5, respectively.

**Table S3:** Fitted Parameters and Model Selection Criteria for Saturated Phagocytosis Model (System 3) - NOMV-Activated Macrophages vs. *E. coli*

| Biological replicates | 1 | 2 | 3 | 4 |
| --- | --- | --- | --- | --- |
| Phagocytosis rate, , (mL/cells/day) | 66.8634 | 78.7081 | 46.6332 | 46.7195 |
| Saturation parameter in phagocytosis efficiency as bacteria cell concentration increases  η (mL/cells) | 4.6978 | 3.864 | 4.224 | 4.2595 |
| Saturation parameter in phagocytosis efficiency as macrophage cell concentration increases  γ (mL/cells) | 14.3003 | 18.7187 | 1.2569 | 0.9496 |
| Extra death rate due to phagocytosis, , (mL/cells/day) | 3.37E-05 | 2.06E-06 | 0.0092 | 0.0126 |
| SSE | 0.0337 | 0.0171 | 0.0092 | 0.0103 |
| AIC | -752.0089 | -845.6307 | -931.1735 | -915.5877 |
| modified AIC | -751.3839 | -845.0057 | -930.5485 | -914.9627 |

**Table S4:** Fitted Parameters and Model Selection Criteria for Semi-Saturated Phagocytosis Model with Bacteria Concentration (System 4) - NOMV-Activated Macrophages vs. *E. coli*

| Biological replicates | 1 | 2 | 3 | 4 |
| --- | --- | --- | --- | --- |
| Phagocytosis rate, , (mL/cells/day) | 68.8233 | 73.0971 | 56.0595 | 60.0507 |
| Saturation parameter in phagocytosis efficiency as bacteria cell concentration increases  η (mL/cells) | 43.9864 | 25.7976 | 54.5774 | 57.2494 |
| Extra death rate due to phagocytosis, , (mL/cells/day) | 2.40E-08 | 1.77E-07 | 0.0027 | 0.0084 |
| SSE | 0.034 | 0.0171 | 0.003 | 0.0049 |
| AIC | -752.8 | -847.6 | -1087.8 | -1020.1 |
| modified AIC | -752.4 | -847.3 | -1087.4 | -1019.7 |

**Table S5:** Fitted Parameters and Model Selection Criteria for Semi-Saturated Phagocytosis Model with Macrophage Concentration (System 5) - NOMV-Activated Macrophages vs. *E. coli*

| Biological replicates | 1 | 2 | 3 | 4 |
| --- | --- | --- | --- | --- |
| Phagocytosis rate, , (mL/cells/day) | 35.5867 | 56.0984 | 49.9454 | 50.0021 |
| Saturation parameter in phagocytosis efficiency as macrophage cell concentration increases  γ (mL/cells) | 71.1729 | 63.2575 | 64.7963 | 63.8335 |
| Extra death rate due to phagocytosis, , (mL/cells/day) | 2.95E-06 | 3.16E-05 | 0.1344 | 0.1884 |
| SSE | 0.034 | 0.0171 | 0.0137 | 0.0104 |
| AIC | -752.7858 | -847.6307 | -878.2230 | -916.2544 |
| modified AIC | -752.4166 | -847.2615 | -877.8537 | -915.8851 |

- 1. Live Cell Imaging Data of Naive Macrophages in Presence of *E. coli*

To investigate the phagocytosis kinetics of naive macrophages against E. coli, we fitted three distinct models (System 3, System 4, and System 5; Methods, main text) to the corresponding live cell imaging (LCI) assay data. The fitted parameters, Sum of Squared Error (SSE), Akaike Information Criterion (AIC), and modified AIC for small sample sizes (AICc) for System 3, System 4, and System 5 are provided in Table S6, Table S7, and Table S8, respectively.

**Table S6:** Fitted Parameters and Model Selection Criteria for Saturated Phagocytosis Model (System 3) - Naive Macrophages vs. *E. coli*

| Biological replicates | 1 | 2 | 3 | 4 | 5 | 6 | 7 |
| --- | --- | --- | --- | --- | --- | --- | --- |
| Phagocytosis rate, , (mL/cells/day) | 50.4068 | 50.8152 | 56.6059 | 49.237 | 49.5568 | 49.2723 | 49.119 |
| Saturation parameter in phagocytosis efficiency as bacteria cell concentration increases  η (mL/cells) | 67.6521 | 68.0495 | 59.8305 | 58.39 | 66.8251 | 71.4966 | 70.4025 |
| Saturation parameter in phagocytosis efficiency as macrophage cell concentration increases  γ (mL/cells) | 0.0211 | 0.1268 | 54.5686 | 61.8907 | 0.0089 | 0.1669 | 0.122 |
| Extra death rate due to phagocytosis, , (mL/cells/day) | 0.4457 | 0.3465 | 4.19E-05 | 2.73E-08 | 0.4685 | 0.3268 | 0.3745 |
| SSE | 0.0166 | 0.0167 | 0.0175 | 0.0141 | 0.0801 | 0.0171 | 0.0248 |
| AIC | -849.7260 | -848.8972 | -842.4399 | -872.2515 | -632.5315 | -845.6307 | -794.3272 |
| modified AIC | -849.1010 | -848.2722 | -841.8149 | -871.6265 | -631.9065 | -845.0057 | -793.7022 |

**Table S7:** Fitted Parameters and Model Selection Criteria for Semi-Saturated Phagocytosis Model with Bacteria Concentration (System 4) - Naive Macrophages vs. *E. coli*

| Biological replicates | 1 | 2 | 3 | 4 | 5 | 6 | 7 |
| --- | --- | --- | --- | --- | --- | --- | --- |
| Phagocytosis rate, , (mL/cells/day) | 66.6254 | 61.0711 | 73.6504 | 72.1898 | 61.3574 | 60.0161 | 60.2089 |
| Saturation parameter in phagocytosis efficiency as bacteria cell concentration increases  η (mL/cells) | 52.0481 | 55.4989 | 26.0224 | 26.5057 | 53.8954 | 54.4341 | 54.2794 |
| Extra death rate due to phagocytosis, , (mL/cells/day) | 0.2887 | 0.0487 | 2.61E-06 | 4.57E-06 | 0.1107 | 0.0452 | 0.058 |
| SSE | 0.1068 | 0.0061 | 0.0175 | 0.0141 | 0.0085 | 0.0081 | 0.0044 |
| AIC | -594.8 | -989.9 | -844.4 | -874.3 | -944.1 | -950.7 | -1035.0 |
| modified AIC | -594.5 | -989.5 | -844.1 | -873.9 | -943.7 | -950.4 | -1034.6 |

**Table S8:** Fitted Parameters and Model Selection Criteria for Semi-Saturated Phagocytosis Model with Macrophage Concentration (System 5) - Naive Macrophages vs. E. coli

| Biological replicates | 1 | 2 | 3 | 4 | 5 | 6 | 7 |
| --- | --- | --- | --- | --- | --- | --- | --- |
| Phagocytosis rate, , (mL/cells/day) | 50.0866 | 50.0416 | 64.6045 | 60.7073 | 50.012 | 49.9803 | 50.0093 |
| Saturation parameter in phagocytosis efficiency as macrophage cell concentration increases  γ (mL/cells) | 57.818 | 60.7902 | 54.8838 | 58.5504 | 57.0684 | 61.7378 | 60.1092 |
| Extra death rate due to phagocytosis, , (mL/cells/day) | 0.3809 | 0.3095 | 9.83E-07 | 4.01E-08 | 0.4001 | 0.2822 | 0.3198 |
| SSE | 0.0166 | 0.0167 | 0.0175 | 0.0141 | 0.0801 | 0.0171 | 0.0248 |
| AIC | -851.7260 | -850.8972 | -844.4399 | -874.2515 | -634.5315 | -847.6307 | -796.3272 |
| modified AIC | -851.3568 | -850.5279 | -844.0706 | -873.8822 | -634.1623 | -847.2615 | -795.9579 |

- 1. Live Cell Imaging Data of NOMV-Activated Macrophages in Presence of *N. gonorrhoeae*

To investigate the phagocytosis kinetics of macrophages activated by N. gonorrhoeae Outer Membrane Vesicles (NOMVs) against N. gonorrhoeae, we fitted three distinct mathematical models (System 3, System 4, and System 5; described in Methods, main text) to the corresponding live cell imaging (LCI) assay data. The fitted parameters, Sum of Squared Error (SSE), Akaike Information Criterion (AIC), and modified AIC for small sample sizes (AICc) for each system are provided in Table S9, Table S10, and Table S11, respectively.

**Table S9:** Fitted Parameters and Model Selection Criteria for Saturated Phagocytosis Model (System 3) - NOMV-Activated Macrophages vs. *N. gonorrhoeae*

| Biological replicates | 1 | 2 | 3 | 4 | 5 |
| --- | --- | --- | --- | --- | --- |
| Phagocytosis rate, , (mL/cells/day) | 47.3779 | 45.6748 | 49.364 | 23.3262 | 27.6001 |
| Saturation parameter in phagocytosis efficiency as bacteria cell concentration increases  η (mL/cells) | 74.8081 | 73.7972 | 64.4408 | 18.032 | 1.9544 |
| Saturation parameter in phagocytosis efficiency as macrophage cell concentration increases  γ (mL/cells) | 0.1301 | 23.098 | 43.4671 | 77.5091 | 76.6851 |
| Extra death rate due to phagocytosis, , (mL/cells/day) | 0.0953 | 5.93E-06 | 5.93E-06 | 3.18E-06 | 0.0196 |
| SSE | 0.0266 | 0.005 | 0.0635 | 0.0634 | 0.0048 |
| AIC | -784.7 | -1015.3 | -664.6 | -664.8 | -1021.0 |
| modified AIC | -784.0 | -1014.7 | -664.0 | -664.2 | -1020.3 |

**Table S10:** Fitted Parameters and Model Selection Criteria for Semi-Saturated Phagocytosis Model with Bacteria Concentration (System 4) - NOMV-Activated Macrophages vs. *N. gonorrhoeae*

| Biological replicates | 1 | 2 | 3 | 4 | 5 |
| --- | --- | --- | --- | --- | --- |
| Phagocytosis rate, , (mL/cells/day) | 64.8426 | 73.285 | 46.8581 | 47.9293 | 19.5402 |
| Saturation parameter in phagocytosis efficiency as bacteria cell concentration increases  η (mL/cells) | 5.2828 | 19.1051 | 67.9002 | 67.4882 | 72.4092 |
| Extra death rate due to phagocytosis, , (mL/cells/day) | 0.3899 | 0.002 | 3.09E-08 | 4.97E-05 | 0.0138 |
| SSE | 0.0082 | 0.005 | 0.0635 | 0.0634 | 0.0042 |
| AIC | -949.1 | -1017.3 | -666.6 | -666.8 | -1041.4 |
| modified AIC | -948.7 | -1017.0 | -666.2 | -666.4 | -1041.0 |

**Table S11:** Fitted Parameters and Model Selection Criteria for Semi-Saturated Phagocytosis Model with Macrophage Concentration (System 5) - NOMV-Activated Macrophages vs. *N. gonorrhoeae*

| Biological replicates | 1 | 2 | 3 | 4 | 5 |
| --- | --- | --- | --- | --- | --- |
| Phagocytosis rate, , (mL/cells/day) | 49.9984 | 68.0498 | 63.2437 | 74.1031 | 50.001 |
| Saturation parameter in phagocytosis efficiency as macrophage cell concentration increases  γ (mL/cells) | 65.6108 | 46.4311 | 54.4128 | 44.4505 | 61.3906 |
| Extra death rate due to phagocytosis, , (mL/cells/day) | 0.0836 | 1.51E-04 | 1.36E-05 | 8.97E-09 | 0.2903 |
| SSE | 0.0266 | 0.005 | 0.0635 | 0.0634 | 0.0326 |
| AIC | -786.7 | -1017.3 | -666.6 | -666.8 | -758.6 |
| modified AIC | -786.3 | -1017.0 | -666.2 | -666.4 | -758.2 |

- 1. Live Cell Imaging Data of Naive Macrophages in Presence of *N. gonorrhoeae*

To investigate the phagocytosis kinetics of naive macrophages against N. gonorrhoeae, we fitted three distinct mathematical models (System 3, System 4, and System 5; described in Methods, main text) to the corresponding live cell imaging (LCI) assay data. The fitted parameters, Sum of Squared Error (SSE), Akaike Information Criterion (AIC), and modified AIC for small sample sizes (AICc) for each system are provided in Table S12, Table S13, and Table S14, respectively.

**Table S12.** Fitted Parameters and Model Selection Criteria for Saturated Phagocytosis Model (System 3) - Naive Macrophages vs. *N. gonorrhoeae*

| Biological replicates | 1 | 2 | 3 | 4 | 5 | 6 | 7 |
| --- | --- | --- | --- | --- | --- | --- | --- |
| Phagocytosis rate, , (mL/cells/day) | 47.6199 | 47.7335 | 0.0719 | 78.4991 | 38.5021 | 48.4022 | 16.3876 |
| Saturation parameter in phagocytosis efficiency as bacteria cell concentration increases  η (mL/cells) | 73.8057 | 74.8552 | 0.2036 | 3.3577 | 43.4596 | 8.9934 | 1.0454 |
| Saturation parameter in phagocytosis efficiency as macrophage cell concentration increases  γ (mL/cells) | 0.1358 | 0.1986 | 0.2319 | 4.4539 | 69.1047 | 73.2936 | 44.9156 |
| Extra death rate due to phagocytosis, , (mL/cells/day) | 0.1961 | 0.1113 | 3.43E-05 | 0.2062 | 2.19E-08 | 0.0477 | 0.0182 |
| SSE | 0.0235 | 0.0162 | 0.0129 | 0.0124 | 0.0223 | 0.006 | 0.0083 |
| AIC | -801.7575 | -853.0920 | -884.5262 | -889.9815 | -808.9906 | -990.1608 | -945.3803 |
| modified AIC | -801.1325 | -852.4670 | -883.9012 | -889.3565 | -808.3656 | -989.5358 | -944.7553 |

**Table S13.** Fitted Parameters and Model Selection Criteria for Semi-Saturated Phagocytosis Model with Bacteria Concentration (System 4) - Naive Macrophages vs. *N. gonorrhoeae*

| Biological replicates | 1 | 2 | 3 | 4 | 5 | 6 | 7 |
| --- | --- | --- | --- | --- | --- | --- | --- |
| Phagocytosis rate, , (mL/cells/day) | 50.6705 | 69.0394 | 67.5151 | 71.9034 | 69.6431 | 20.7509 | 19.823 |
| Saturation parameter in phagocytosis efficiency as bacteria cell concentration increases  η (mL/cells) | 5.9423 | 6.6237 | 6.715 | 7.7576 | 42.9766 | 72.1989 | 72.8661 |
| Extra death rate due to phagocytosis, , (mL/cells/day) | 0.4825 | 0.4158 | 0.1183 | 0.1992 | 1.88E-07 | 0.0208 | 0.0149 |
| SSE | 0.0322 | 0.0096 | 0.0091 | 0.0124 | 0.0223 | 0.0063 | 0.0101 |
| AIC | -760.2922 | -927.3003 | -934.6817 | -891.9815 | -810.9906 | -985.4277 | -920.2937 |
| modified AIC | -759.9230 | -926.9310 | -934.3125 | -891.6122 | -810.6214 | -985.0585 | -919.9245 |

**Table S14.** Fitted Parameters and Model Selection Criteria for Semi-Saturated Phagocytosis Model with Macrophage Concentration (System 5) - Naive Macrophages vs. *N. gonorrhoeae*

| Biological replicates | 1 | 2 | 3 | 4 | 5 | 6 | 7 |
| --- | --- | --- | --- | --- | --- | --- | --- |
| Phagocytosis rate, , (mL/cells/day) | 49.9652 | 50.2589 | 49.904 | 49.9774 | 59.8801 | 49.995 | 50.2828 |
| Saturation parameter in phagocytosis efficiency as macrophage cell concentration increases  γ (mL/cells) | 64.178 | 64.396 | 66.411 | 66.4987 | 60.0922 | 62.4944 | 61.2259 |
| Extra death rate due to phagocytosis, , (mL/cells/day) | 0.1706 | 0.0958 | 0.011 | 0.0201 | 1.64E-05 | 0.2499 | 0.2875 |
| SSE | 0.0235 | 0.0162 | 0.0129 | 0.0215 | 0.0223 | 0.009 | 0.0307 |
| AIC | -803.7575 | -855.0920 | -886.5262 | -816.0323 | -810.9906 | -936.2066 | -766.8753 |
| modified AIC | -803.3883 | -854.7228 | -886.1570 | -815.6630 | -810.6214 | -935.8374 | -766.5061 |

1. *E. coli* Kinetics in Presence of Macrophages Modelled by Semi-Saturated Systems (Systems 4 and 5)

As discussed previously, the semi-saturated models (System 4 and System 5) generally provided a better fit to the live cell imaging data than the saturated model (System 3). However, when applied to E. coli kinetics in the presence of macrophages, both semi-saturated models yielded biologically unrealistic predictions regarding the macrophage concentration required for bacterial inhibition.

Specifically, System 5 predicted bacterial inhibition at an extremely low macrophage concentration, less than 1 cell/mL, which is not biologically plausible. Conversely, System 4 predicted that bacterial inhibition would only occur at a very high macrophage concentration (approximately 4.5 × 109 cells/mL), which also falls outside typical physiological ranges.

For illustration:

- **System 4:** Incorporating the estimated parameters (second column in Table S14), the bifurcation diagram for System 4 is presented in Figure S2. This figure indicates that E. coli inhibition occurs at approximately 4.5 × 109cells/mL, a macrophage concentration significantly higher than normally encountered.
- **System 5:** Utilizing the estimated parameters (second column in Table S15), the bifurcation diagram for System 5 is shown in Figure S3. This model predicts *E. coli* inhibition at macrophage concentrations less than 1 cell/mL, which is not biologically reasonable.


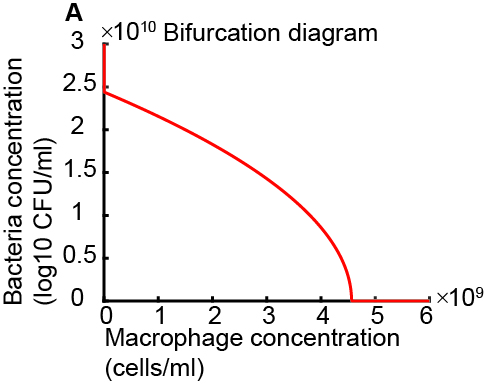


**Figure. S2** **Bifurcation Diagram for Semi-Saturated Phagocytosis Model with Bacteria Concentration (System 4).** This figure presents the bifurcation diagram derived from System 4, illustrating the long-term *E. coli* kinetics as a function of macrophage concentration. The diagram indicates that bacterial inhibition occurs at approximately 4.5 × 109 cells/mL, a macrophage concentration significantly higher than physiologically relevant levels.


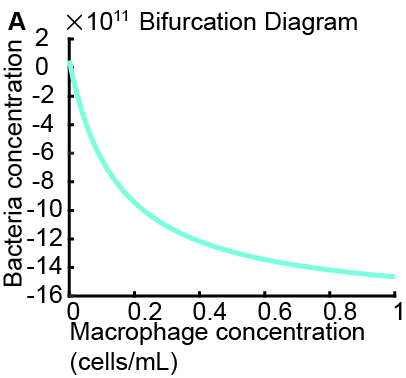


**Figure. S3** **Bifurcation Diagram for Semi-Saturated Phagocytosis Model with Macrophage Concentration (System 5).** This figure presents the bifurcation diagram derived from System 5, illustrating the long-term E. coli kinetics as a function of macrophage concentration. The diagram indicates that bacterial inhibition occurs at macrophage concentrations less than 1 cell/mL, which is not biologically plausible.

1. Activated and Naive Macrophage Kinetics Tested Against *E. coli*

The main text (Figures 4 and 5) details the kinetics of *E. coli* in the presence of both naive and activated macrophages. Complementing those findings, this section provides the corresponding macrophage kinetics: the activated macrophage kinetics are shown in Figure S4, and the naive macrophage kinetics are shown in Figure S5.


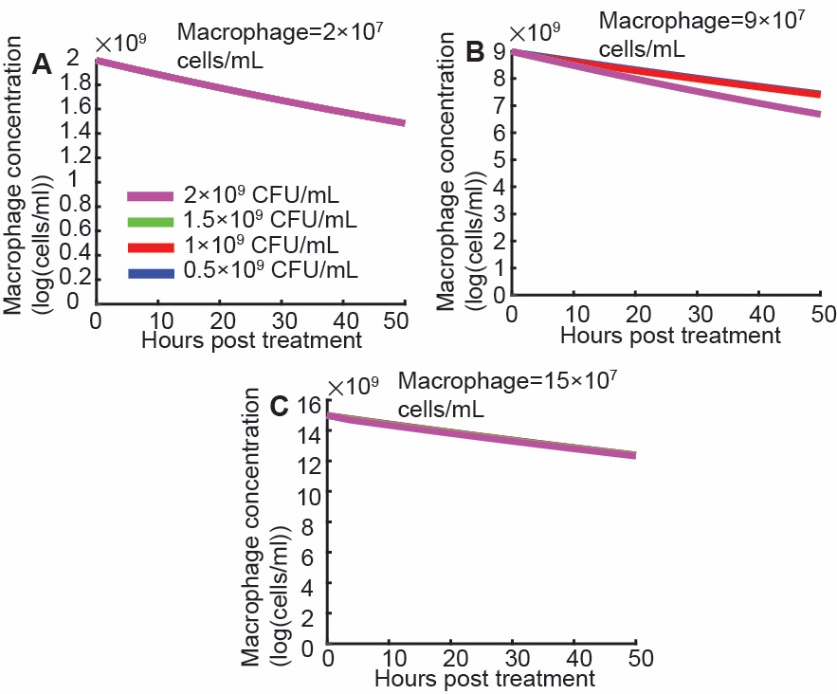


**Figure. S4** **Activated Macrophage Kinetics Across Varying Bacterial Inoculum Sizes.** This figure illustrates the dynamic changes in activated macrophage concentration over time when co-cultured with *E. coli* at different initial bacterial inoculum sizes and macrophage concentrations. **(A) Macrophage Concentration at 2 × 107 cells/mL:** Kinetics of activated macrophage concentration starting at 2 × 107 cells/mL. **(B) Macrophage Concentration at 9 × 107 cells/mL:** Kinetics of activated macrophage concentration starting at 9 × 107 cells/mL. **(C) Macrophage Concentration at 15 × 107 cells/mL:** Kinetics of activated macrophage concentration starting at 15 × 107 cells/mL. In panels (A-C), the blue, red, green, and purple lines (and corresponding circles) represent macrophage kinetics when co-cultured with initial *E. coli* inoculum sizes of 0.5×109 CFU/mL, 1×109 CFU/mL, 1.5×109 CFU/mL, and 2×109 CFU/mL, respectively.


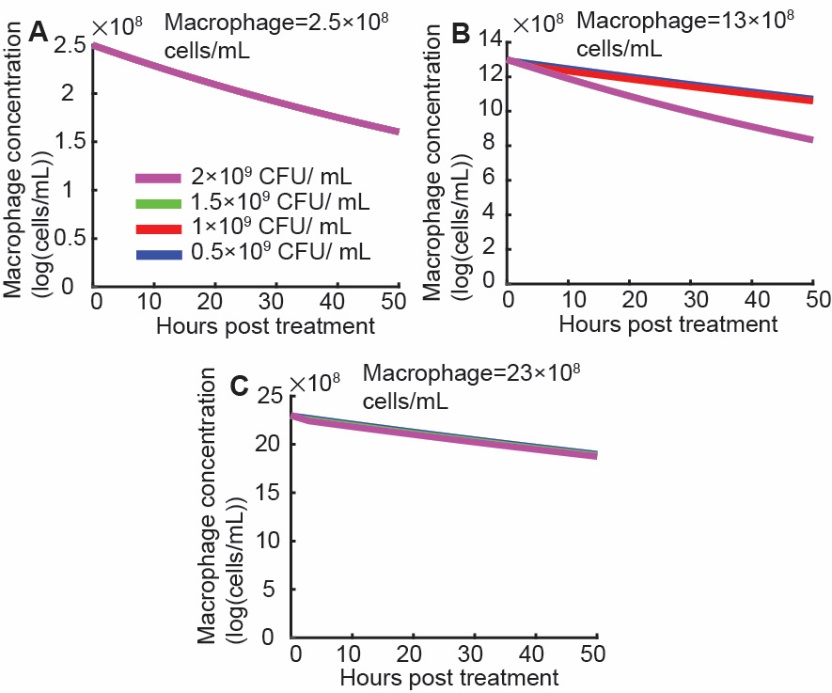


**Figure. S5** **Naive Macrophage Kinetics Across Varying Bacterial Inoculum Sizes.** This figure illustrates the dynamic changes in naive macrophage concentration over time when co-cultured with E. coli at different initial bacterial inoculum sizes and macrophage concentrations. **(A) Macrophage Concentration at 2 × 107 cells/mL:** Kinetics of naive macrophage concentration starting at 2 × 107 cells/mL. **(B) Macrophage Concentration at 9 × 107 cells/mL:** Kinetics of naive macrophage concentration starting at 9 × 107 cells/mL. **(C) Macrophage Concentration at 15 × 107 cells/mL:** Kinetics of naive macrophage concentration starting at 15 × 107 cells/mL. In panels (A-C), the blue, red, green, and purple lines (and corresponding circles) represent macrophage kinetics when co-cultured with initial E. coli inoculum sizes of 0.5×109 CFU/mL, 1×109 CFU/mL, 1.5×109 CFU/mL, and 2×109 CFU/mL, respectively.

1. N. gonorrhoeae Kinetics in Presence of Naive/Activated Macrophages

Building upon the *E. coli* kinetics presented in the main text (Figures 4 and 5), this section details the dynamics of *N. gonorrhoeae* when co-cultured with naive and activated macrophages. Our analysis demonstrates that **bistable *N. gonorrhoeae* kinetics exist regardless of whether macrophages are activated or naive** (Figures S6 and S7).

Similar to our observations with *E. coli*, distinct threshold values for macrophage concentration are associated with the inhibition of *N. gonorrhoeae*:

- For **activated macrophages**, the threshold macrophage concentration corresponding to inhibition of *N. gonorrhoeae* is approximately 4.9 × 108 cells/mL (Figure S6D).
- For **naive macrophages**, this threshold value is considerably higher, approximately 5.6 × 109 cells/mL (Figure S7D).


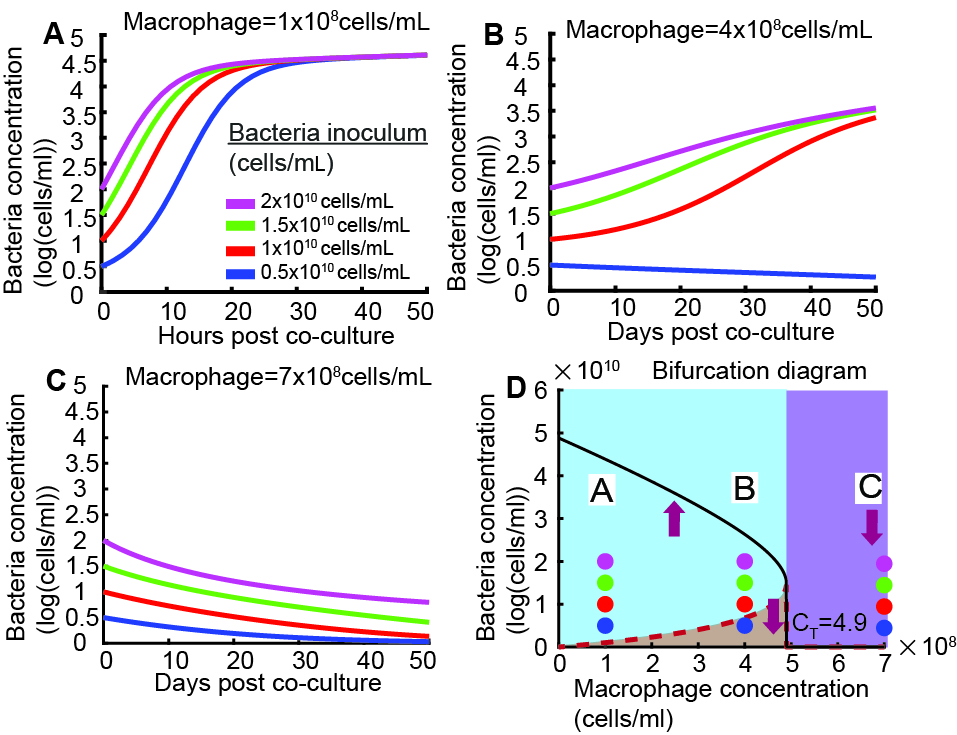


**Figure S6: Simulated Kinetics of *N. gonorrhoeae* with Activated Macrophages.** This figure displays the simulated kinetics of *N. gonorrhoeae* in co-culture with NOMV-activated macrophages, illustrating bistable behaviour influenced by initial bacterial inoculum size and macrophage concentration. The plots use estimated parameters relevant to this interaction. **(A)** and **(B) Macrophage Concentration Below CT:** When the activated macrophage concentration is between 0 and a critical threshold (CT), *N. gonorrhoeae* kinetics show bistability. Bacterial populations with an inoculum size above the dashed red curve persist (i.e., are not eradicated), while those with an inoculum size below the dashed red curve are suppressed. **(C) Macrophage Concentration Above CT:** When the activated macrophage concentration is greater than CT (approximately 4.9 × 108 cells/mL), *N. gonorrhoeae* kinetics are inhibited regardless of the initial inoculum size. **(D) Bifurcation Diagram of *N. gonorrhoeae* Concentration vs. Activated Macrophage Concentration:** This diagram illustrates the long-term steady states of *N. gonorrhoeae* concentration as a function of activated macrophage concentration. The **red dashed curve** represents the unstable equilibrium (critical inoculum threshold), which increases with rising macrophage concentration, separating the basins of attraction for bacterial persistence and eradication. The **black solid curve** represents the stable equilibrium point, or the maximal carrying capacity of *N. gonorrhoeae*, which decreases as macrophage concentration increases. **Purple arrows** indicate the direction of the bacterial dynamics from various initial inoculum sizes. In panels (A-D), the blue, red, green, and purple lines (and corresponding circles) consistently represent N. gonorrhoeae kinetics originating from initial inoculum sizes of 0.5×109 CFU/mL, 1×109 CFU/mL, 1.5×109 CFU/mL, and 2×109 CFU/mL, respectively.


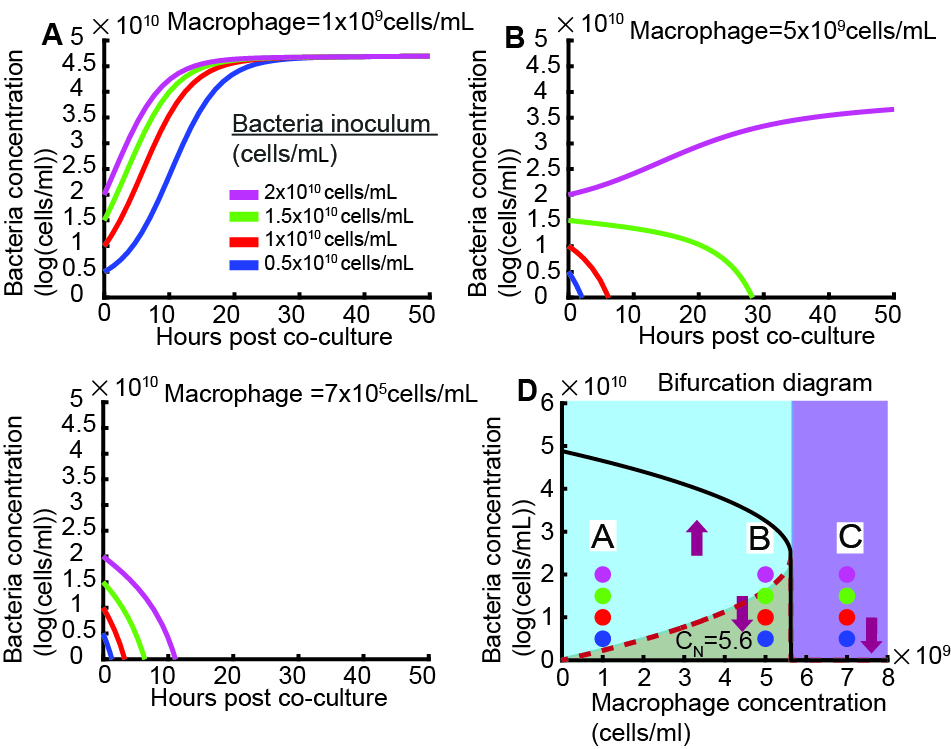


**Figure S7: Simulated Kinetics of *N. gonorrhoeae* with Naive Macrophages.** This figure displays the simulated kinetics of *N. gonorrhoeae* in co-culture with naive macrophages, illustrating bistable behaviour influenced by initial bacterial inoculum size and macrophage concentration. The plots use estimated parameters relevant to this interaction. **(A) and (B) Macrophage Concentration Below CN:** When the naive macrophage concentration is between 0 and a critical threshold (CN), *N. gonorrhoeae* kinetics show bistability. Bacterial populations with an inoculum size above the dashed red curve persist (i.e., are not eradicated), while those with an inoculum size below the dashed red curve are suppressed. **(C) Macrophage Concentration Above CN:** When the naive macrophage concentration is greater than CN (approximately 5.6 × 109 cells/mL), *N. gonorrhoeae* kinetics are inhibited regardless of the initial inoculum size. **(D) Bifurcation Diagram of *N. gonorrhoeae* Concentration vs. Naive Macrophage Concentration:** This diagram illustrates the long-term steady states of *N. gonorrhoeae* concentration as a function of naive macrophage concentration. The **red dashed curve** represents the unstable equilibrium (critical inoculum threshold), which increases with rising macrophage concentration, separating the basins of attraction for bacterial persistence and eradication. The **black solid curve** represents the stable equilibrium point, or the maximal carrying capacity of *N. gonorrhoeae*, which decreases as macrophage concentration increases. **Purple arrows** indicate the direction of the bacterial dynamics from various initial inoculum sizes.In panels (A-D), the blue, red, green, and purple lines (and corresponding circles) consistently represent N. gonorrhoeae kinetics originating from initial inoculum sizes of 0.5×109 CFU/mL, 1×109 CFU/mL, 1.5×109 CFU/mL, and 2×109 CFU/mL, respectively.

**Reference**

1. Kandinov, I., et al., *In vitro Susceptibility to β-Lactam Antibiotics and Viability of Neisseria gonorrhoeae Strains Producing Plasmid-Mediated Broad- and Extended-Spectrum β-Lactamases.* Frontiers in Microbiology, 2022. **13**.

2. McQuillan, J.S., et al., *Silver nanoparticle enhanced silver ion stress response in Escherichia coli K12.* Nanotoxicology, 2012. **6**(8): p. 857-866.
